# Supplementary material for: Nano-spatially confined and interface-controlled lithiation–delithiation in an in situ formed (SnS–SnS2–S)/FLG composite: a route to an ultrafast and cycle-stable anode for lithium-ion batteries
Source: Royal Society of Chemistry journal article supplement (doi:10.1039/c9ta03996a), 2019-01-01
Supplement: c9ta03996a1.pdf [file c9ta03996a1.pdf]

**Nano-spatially confined and interface-controlled lithiation-delithiation combined in in-situ formed (SnS-SnS<sub>2</sub>-S)/FLG composite: A route to ultrafast and cycle-stable anode for lithium-ion batteries**

*Deliang Cheng<sup>a</sup>, Lichun Yang<sup>a</sup>, Jiangwen Liu<sup>a</sup>, Renzong Hu<sup>a</sup>, Jun Liu<sup>a</sup>, Ke Pei<sup>b</sup>, Min Zhu<sup>\*a</sup> and Renchao Che<sup>\*b</sup>*

<sup>a</sup>Guangdong Provincial Key Laboratory of Advanced Energy Storage Materials, School of Materials Science and Engineering, South China University of Technology, Guangzhou 510641, China

\* E-mail: memzhu@scut.edu.cn

<sup>b</sup>Laboratory of Advanced Materials, Department of Materials Science and Collaborative Innovation Center of Chemistry for Energy Materials, Fudan University, Shanghai, 200438, China

\* E-mail: rcche@fudan.edu.cn

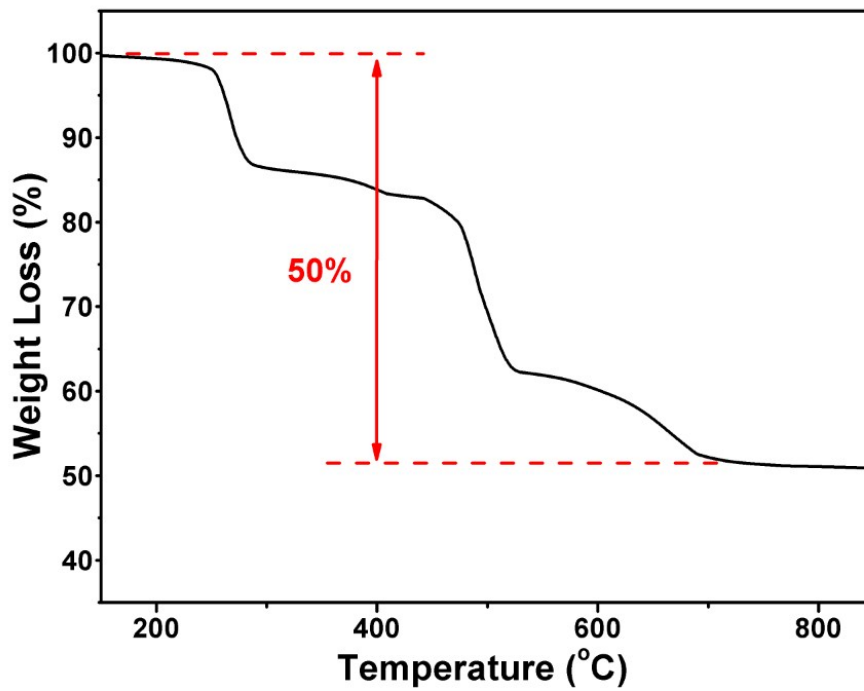

Fig. S1. TG profile of (SnS-SnS<sub>2</sub>-S)/FLG.

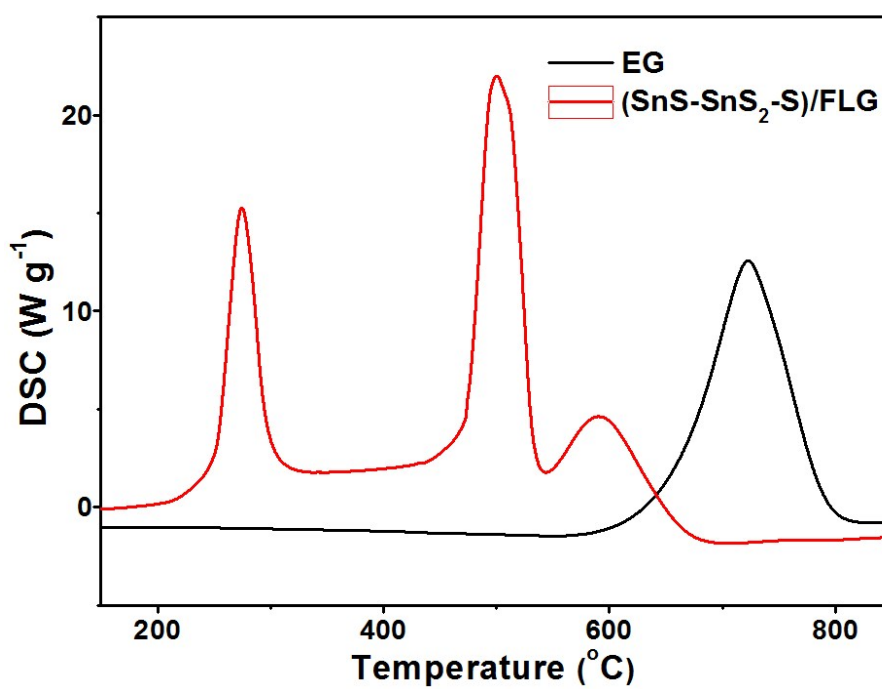

Fig. S2. DSC curves of EG and (SnS-SnS<sub>2</sub>-S)/FLG.

**Calculation of contents of SnS, SnS<sub>2</sub>, S, FLG in the (SnS-SnS<sub>2</sub>-S)/FLG composite.**

① Based on the deconvoluted peak areas, the ratio of Sn<sup>4+</sup>/Sn<sup>2+</sup> is 0.4, the ratio of S<sup>2-</sup>/S<sup>0</sup> is 1.48. Set the content of SnS is x, so the content of SnS<sub>2</sub> is 183\*0.4x/151, the content of S is 32\*(x+0.4x\*2)/1.5/151, respectively.

② Based on the TG curve of the (SnS-SnS<sub>2</sub>-S)/FLG composite, 50 wt% of the weight is lost during 200~800 °C, which originates from the combustion of S, FLG and oxidation of SnS<sub>x</sub>.

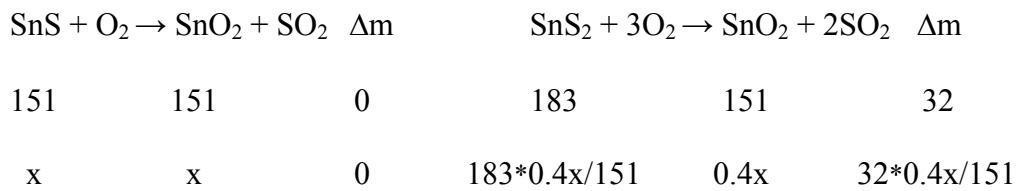

Set the content of FLG is y, and then equations can be:

$$\begin{cases} x + 183*0.4x/151 + 32*1.2x/151 + y = 1. \\ 32*0.4x/151 + 32*1.2x/151 + y = 0.50. \end{cases}$$

So x = 0.357, y = 0.379.

Finally, the contents of SnS, SnS<sub>2</sub>, S, FLG in the (SnS-SnS<sub>2</sub>-S)/FLG composite can be determined to be 35.7, 17.3, 9.1, 37.9 wt%.

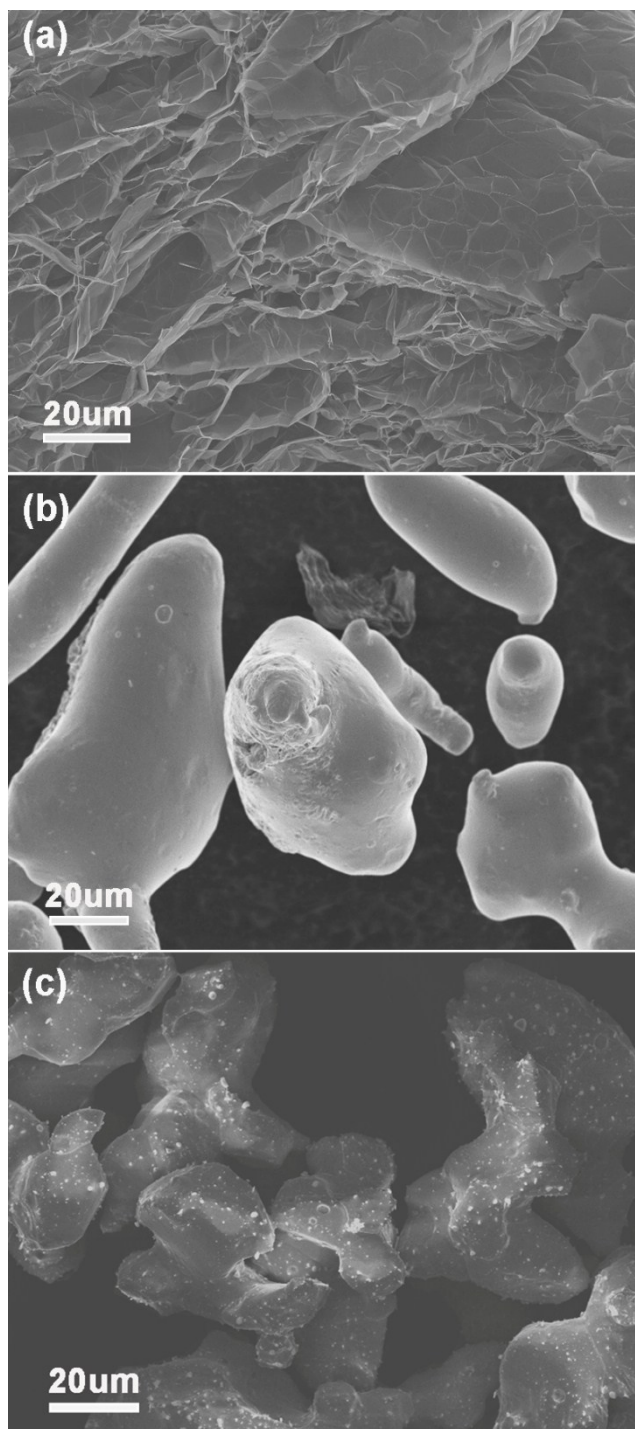

Fig. S3. SEM images of (a) EG powder, (b) Sn powder, (c) S powder.

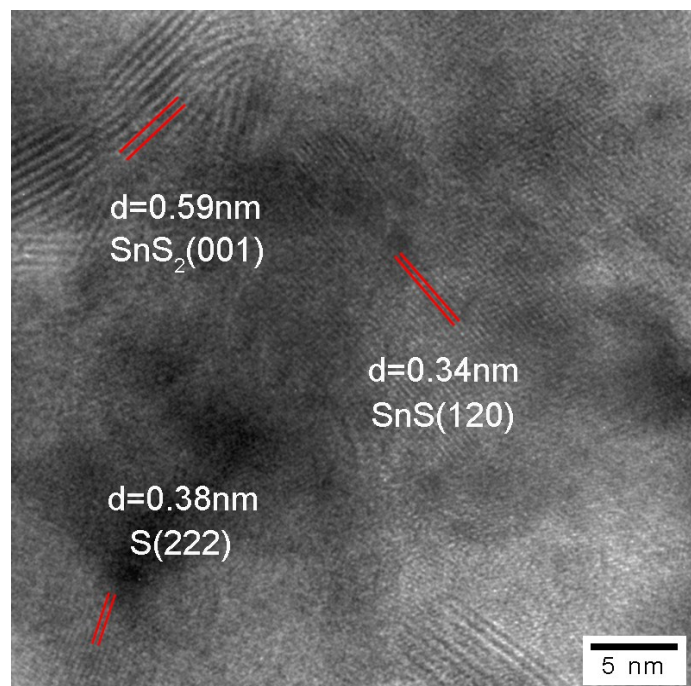

Fig. S4. HRTEM image of the SnS-SnS<sub>2</sub>-S.

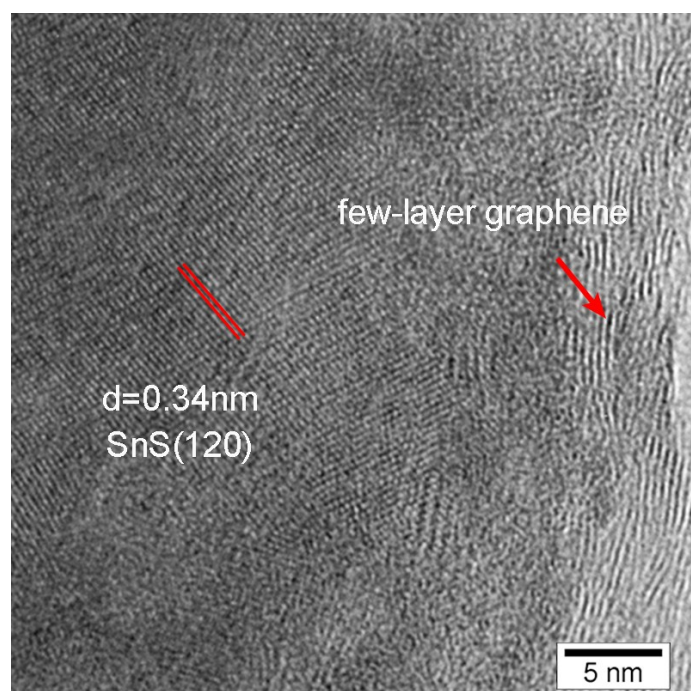

Fig. S5. HRTEM image of the SnS/FLG.

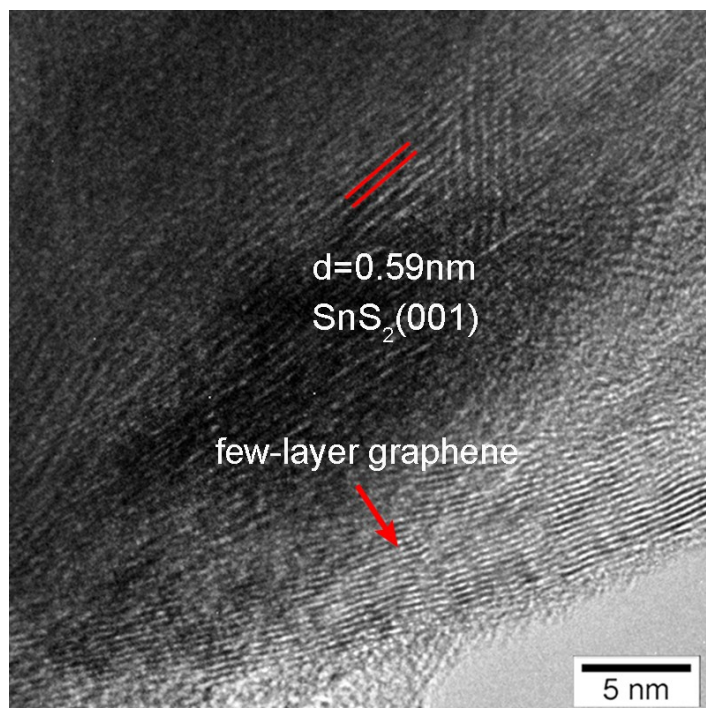

Fig. S6. HRTEM image of the SnS<sub>2</sub>/FLG.

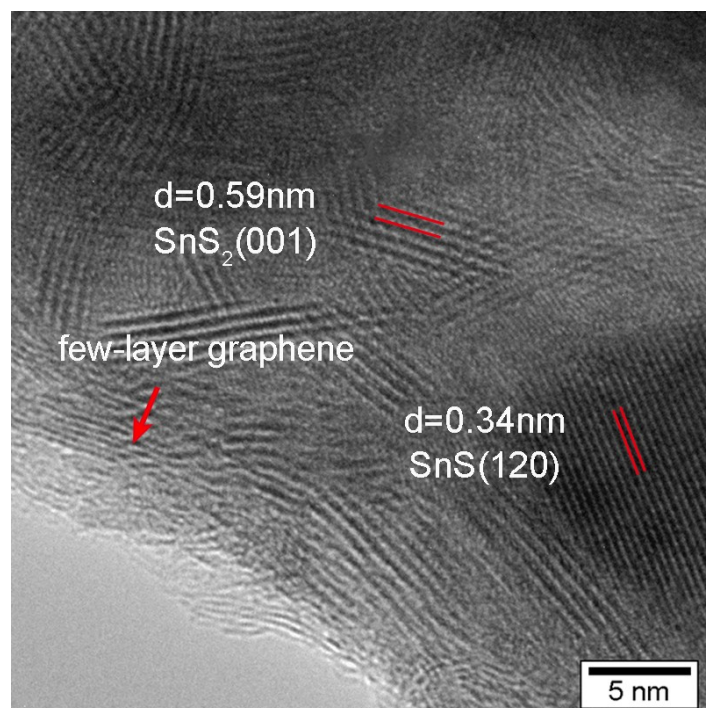

Fig. S7. HRTEM image of the (SnS-SnS<sub>2</sub>)/FLG.

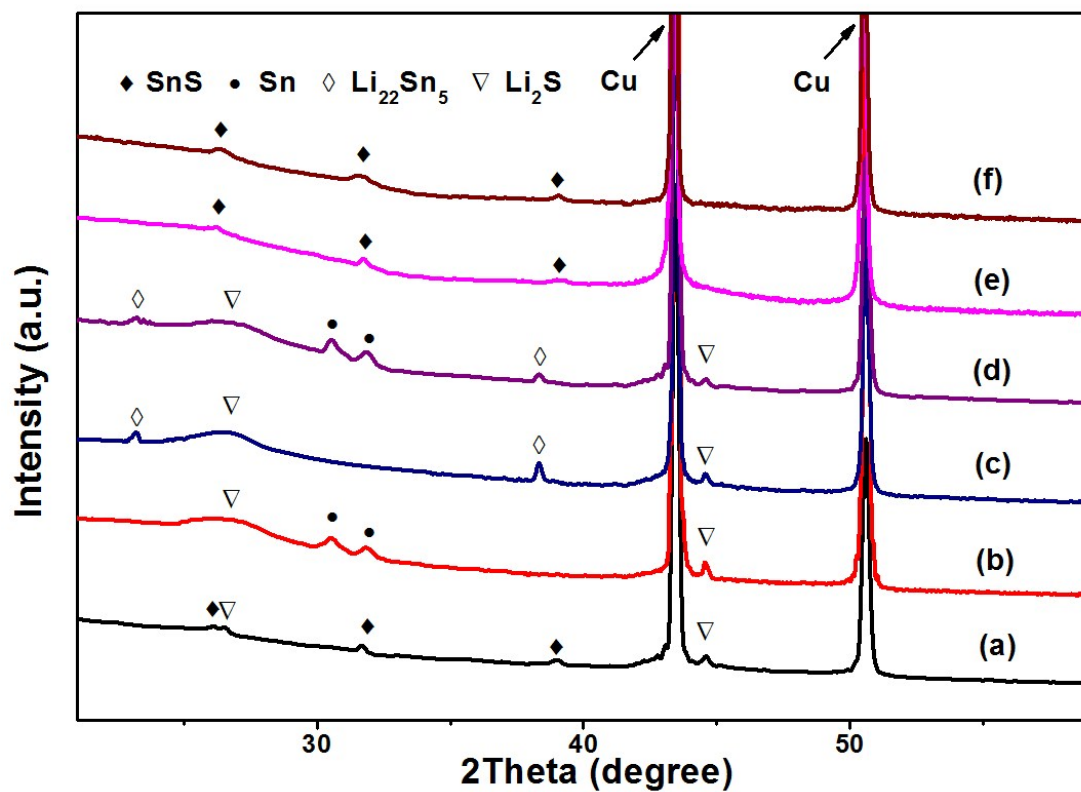

Fig. S8. Ex-situ XRD patterns of the (SnS-SnS<sub>2</sub>-S)/FLG anode taken at different discharge/charge states (vs. Li/Li<sup>+</sup>): (a) discharged to 1.6 V, (b) discharged to 0.85 V, (c) discharged to 0.01 V, (d) charged to 0.80 V, (e) charged to 2.0 V, (f) charged to 3.0 V. (Discharged/charged galvanostatically at 0.05 A g<sup>-1</sup>).

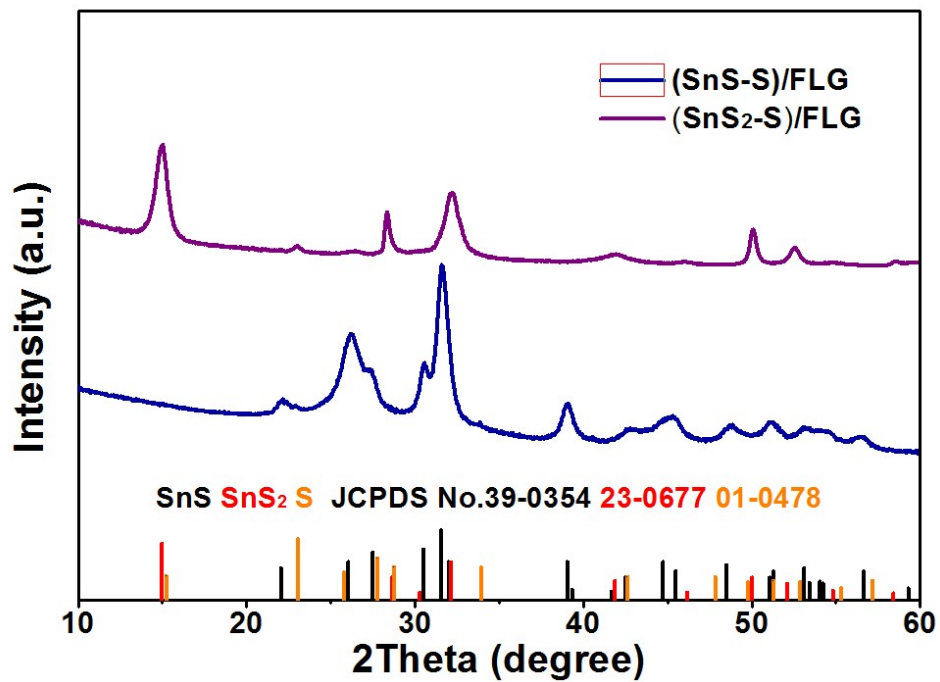

Fig. S9. XRD patterns of the (SnS-S)/FLG and (SnS<sub>2</sub>-S)/FLG.

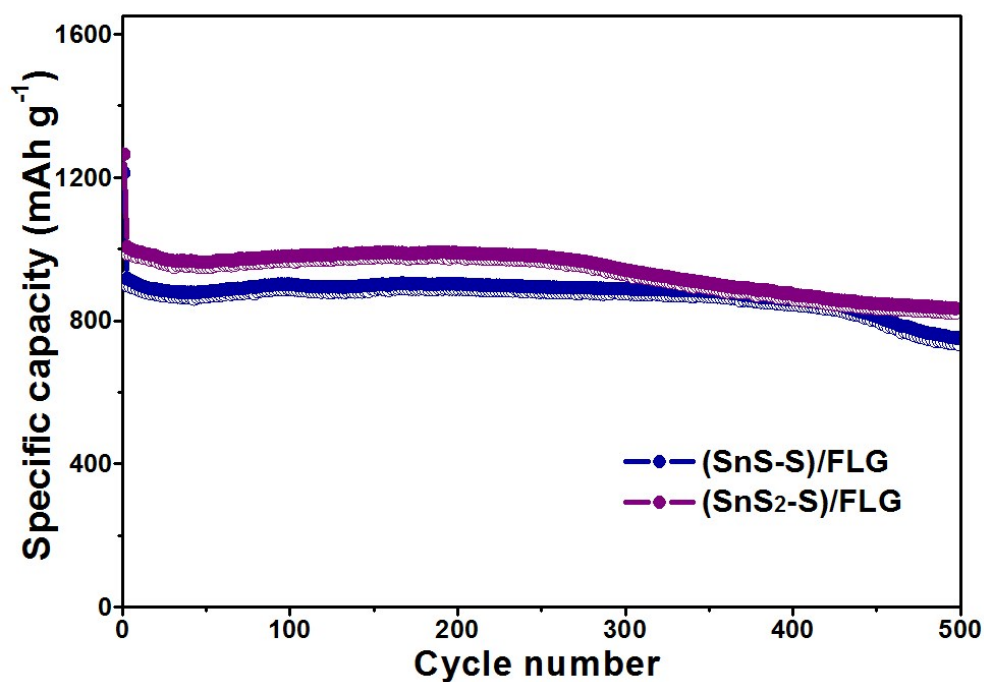

Fig. S10. Cycling performance of the (SnS-S)/FLG and (SnS<sub>2</sub>-S)/FLG tested at 0.2 A g<sup>-1</sup>.



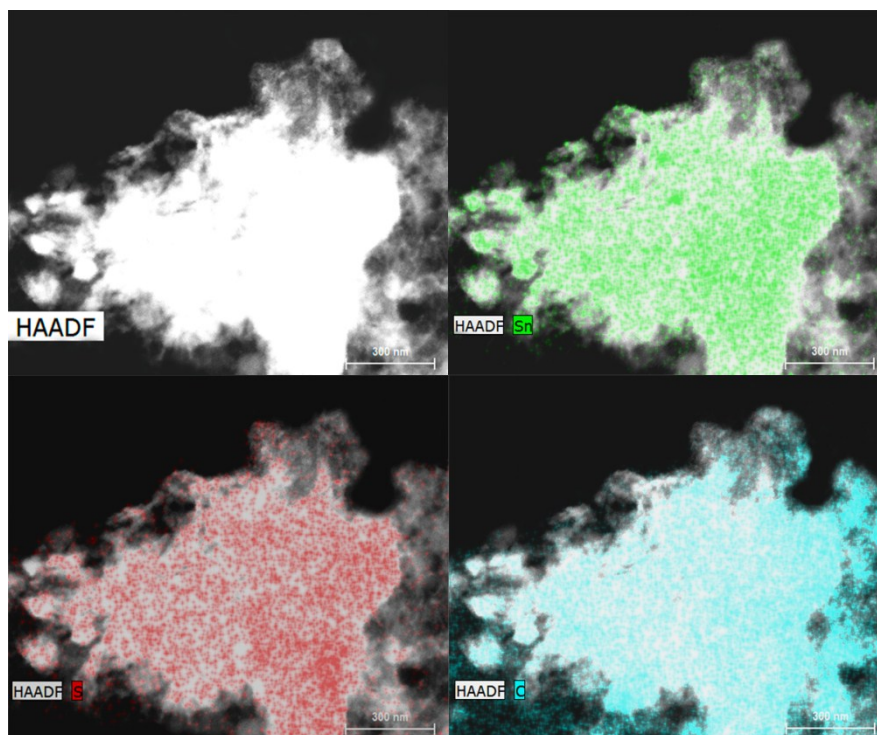

Fig. S11. Elemental mapping of (SnS-SnS<sub>2</sub>-S)/FLG after 500 charge/discharge cycles.

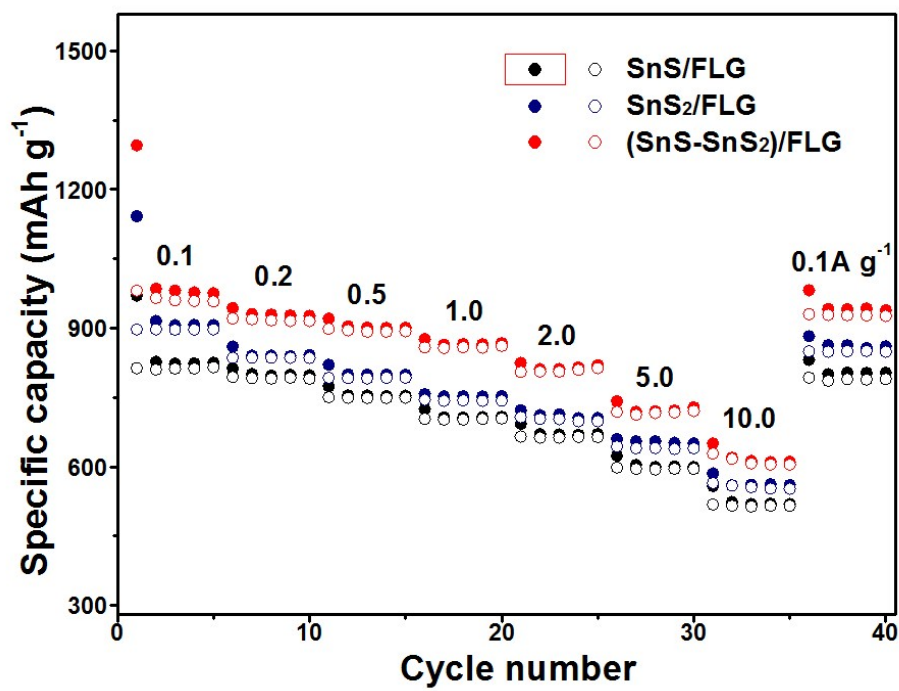

Fig. S12. Rate performance of SnS/FLG, SnS<sub>2</sub>/FLG and (SnS-SnS<sub>2</sub>)/FLG tested at various current densities (vs. Li/Li<sup>+</sup>).

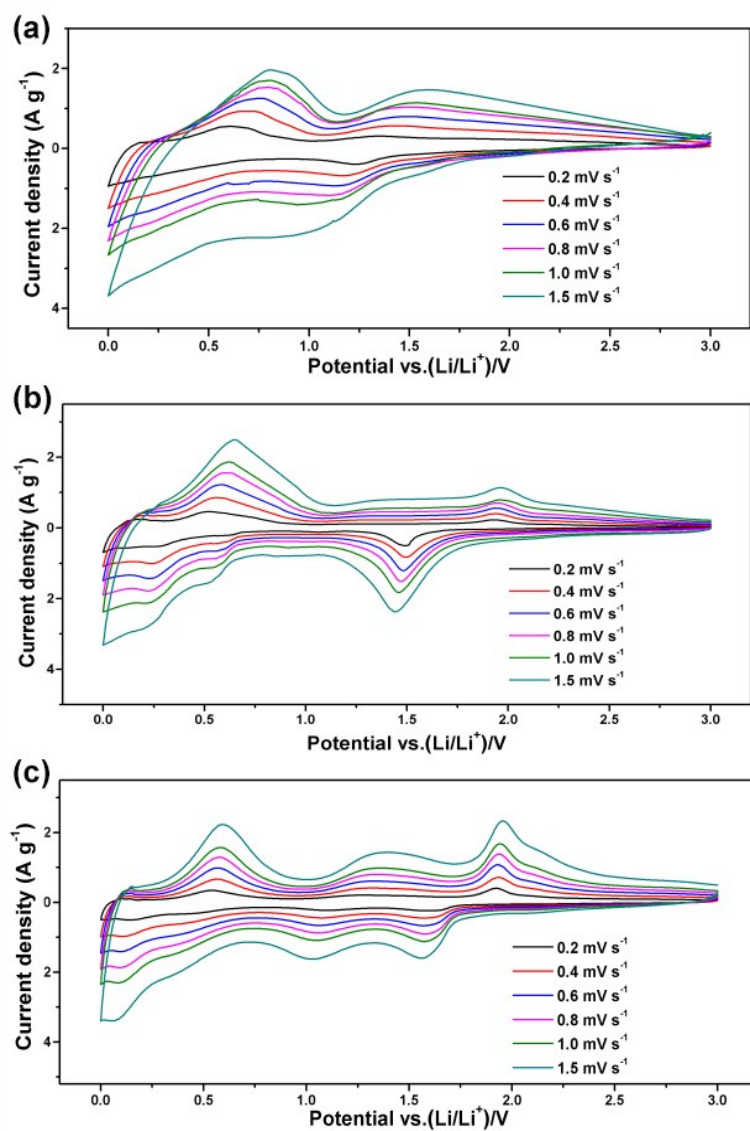

Fig. S13. CV curves of (a) SnS/FLG, (b) SnS<sub>2</sub>/FLG and (c) (SnS-SnS<sub>2</sub>)/FLG at various scan rates, from 0.2 to 1.5 mV s<sup>-1</sup>.

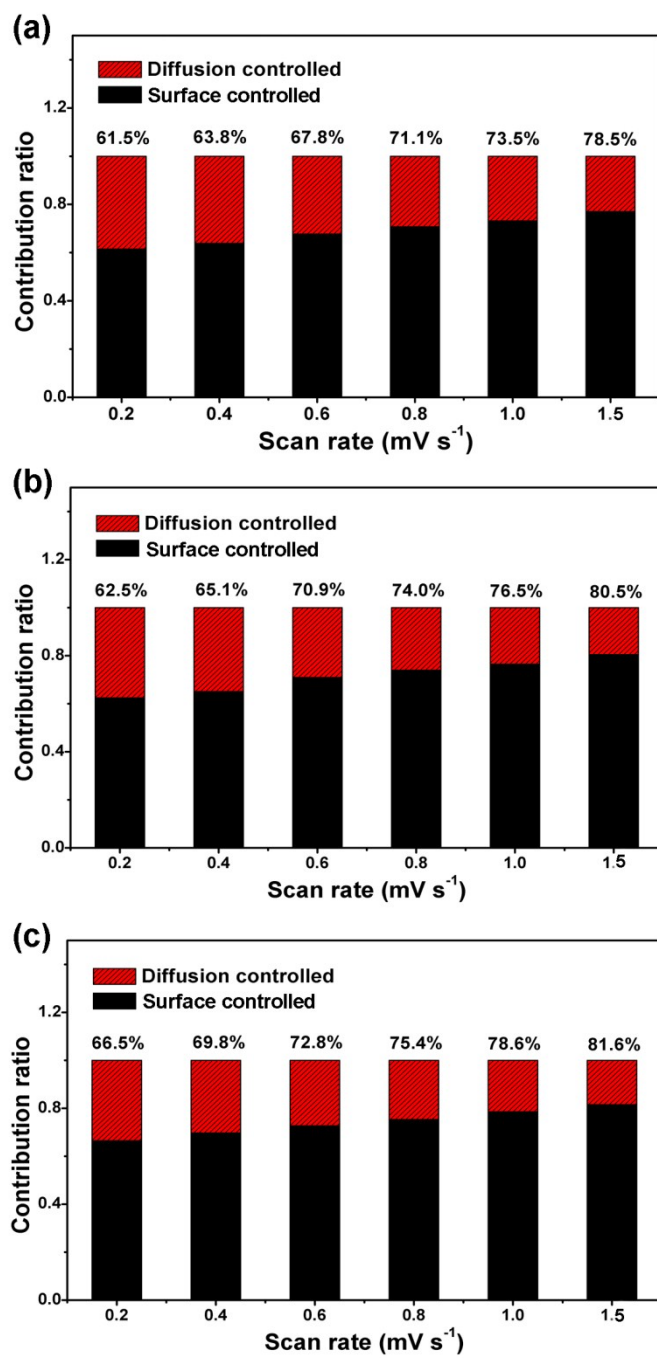

Fig. S14. Capacitive contribution at different scan rates of (a) SnS/FLG, (b) SnS<sub>2</sub>/FLG and (c) (SnS-SnS<sub>2</sub>)/FLG.

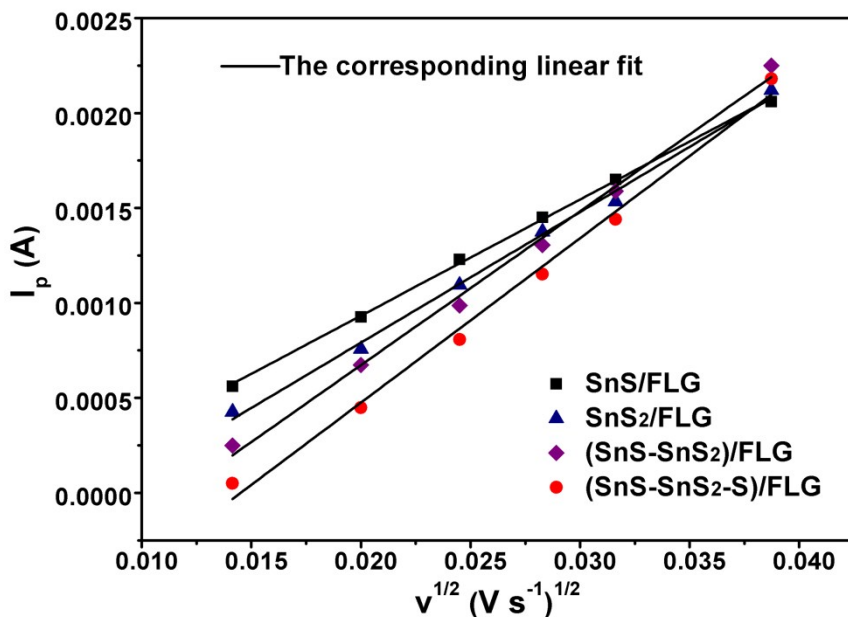

Fig. S15. Corresponding relationship between peak currents and sweep rates of the SnS/FLG, SnS<sub>2</sub>/FLG, (SnS-SnS<sub>2</sub>)/FLG and (SnS-SnS<sub>2</sub>-S)/FLG.

The anodic peak currents  $I_p$  at different scan rates are adopted to calculate the Li<sup>+</sup> diffusion coefficients ( $D$ ) of these electrodes according to the following Randles Sevcik equation:  $I_p = 2.69 \times 10^5 A C D^{1/2} n^{3/2} v^{1/2}$ , where  $A$  stands for the anode area (cm<sup>2</sup>),  $C$  is for the shuttle concentration (mol cm<sup>-3</sup>),  $n$  is for the involved electron numbers in the redox action, and  $v$  is for the scan rate (V s<sup>-1</sup>). With this data, a fitting straight-line can be obtained with  $v^{1/2}$  as the x-axis and  $I_p$  as the y-axis. Therefore, the line slope and Li<sup>+</sup> diffusion coefficient can be calculated and listed in Table S1.

Table S1. Line slopes and Li<sup>+</sup> diffusion coefficients of the SnS/FLG, SnS<sub>2</sub>/FLG, (SnS-SnS<sub>2</sub>)/FLG and (SnS-SnS<sub>2</sub>-S)/FLG.

| Sample                        | Line slop | Diffusion coefficient (cm <sup>2</sup> s <sup>-1</sup> ) |
|-------------------------------|-----------|----------------------------------------------------------|
| SnS/FLG                       | 0.06115   | $3.96 \times 10^{-7}$                                    |
| SnS <sub>2</sub> /FLG         | 0.06791   | $4.96 \times 10^{-7}$                                    |
| (SnS-SnS <sub>2</sub> )/FLG   | 0.08027   | $6.83 \times 10^{-7}$                                    |
| (SnS-SnS <sub>2</sub> -S)/FLG | 0.08695   | $8.01 \times 10^{-7}$                                    |

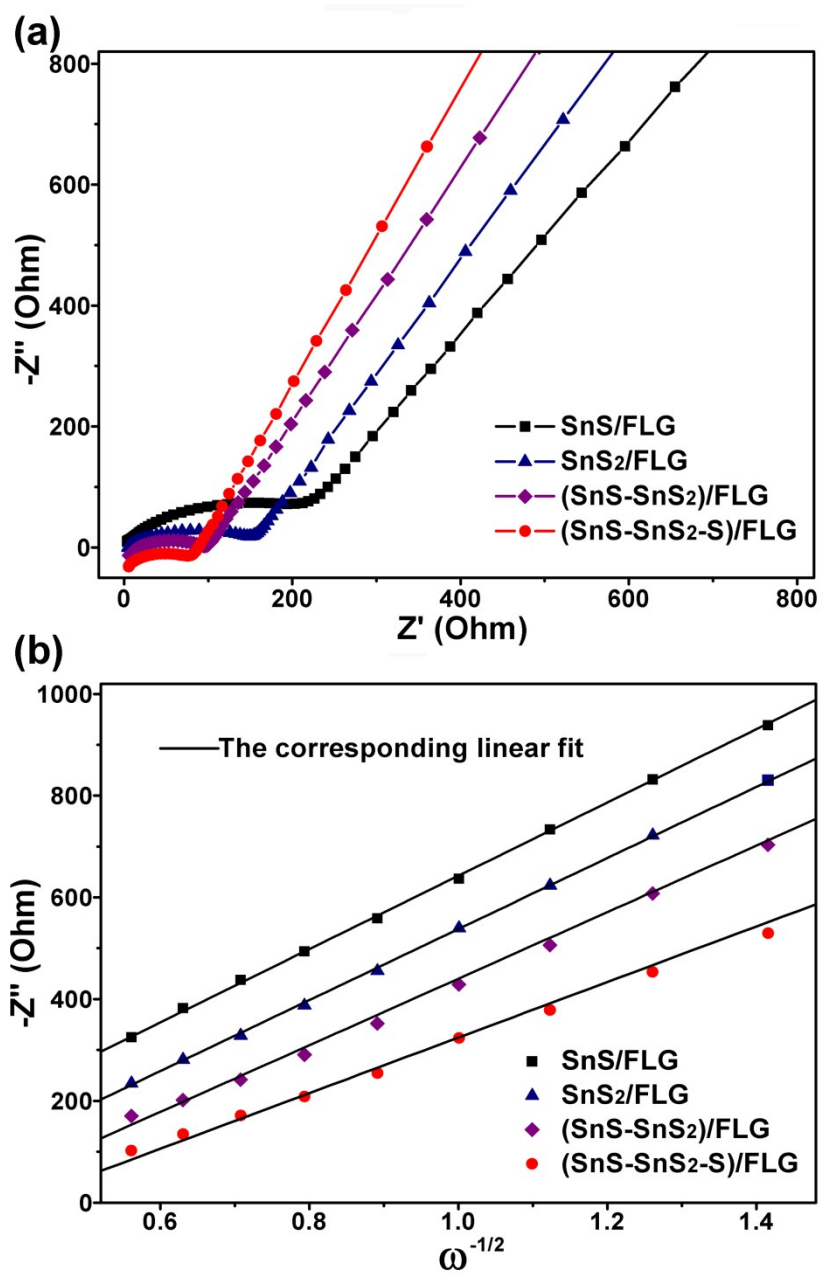

Fig. S16. (a) Nyquist plots, (b) the corresponding linear fits in the low-frequency region of the SnS/FLG, SnS<sub>2</sub>/FLG, (SnS-SnS<sub>2</sub>)/FLG and (SnS-SnS<sub>2</sub>-S)/FLG.

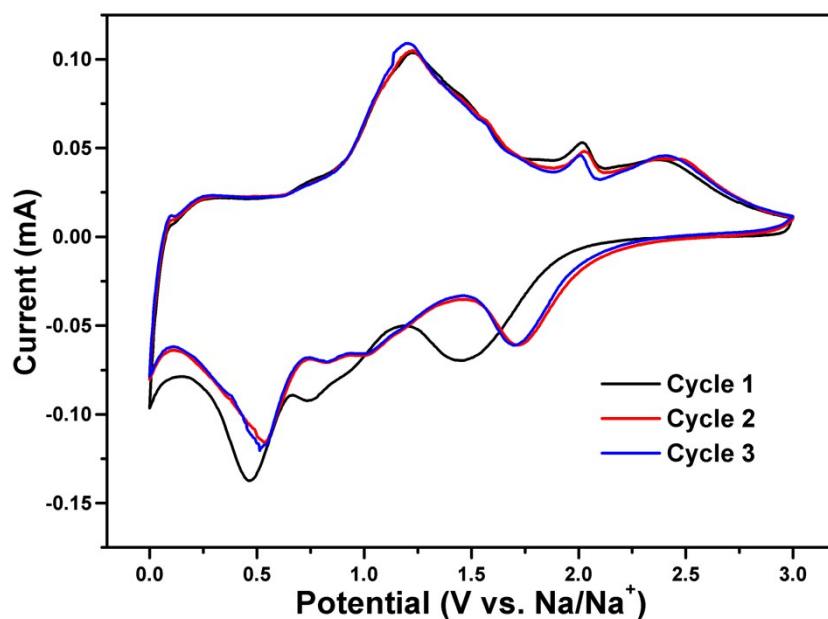

Fig. S17. CV profiles of (SnS-SnS<sub>2</sub>-S)/FLG scanned at 0.1 mV s<sup>-1</sup> (vs. Na/Na<sup>+</sup>).

In the first cathodic sweep, the peaks located at 0.75~1.95 V associate with the conversion reaction of S and SnS<sub>x</sub> with Na<sup>+</sup> as well as the formation of SEI. And the peaks at 0.01~0.5 V are ascribed to the alloying reaction between Sn and Na<sup>+</sup> to form Na<sub>x</sub>Sn alloy. In the anodic sweep, the peaks at 0.09, 0.24 and 1.2 V correspond to the dealloying of Na<sub>x</sub>Sn alloy and conversion of Sn with Na<sub>2</sub>S. And the peaks at 2.0 and 2.35 V are ascribed to the conversion of Na<sub>2</sub>S to polysulfides.
